# Supplementary material for: Fernblock® Upregulates NRF2 Antioxidant Pathway and Protects Keratinocytes from PM2.5-Induced Xenotoxic Stress
Source: Hindawi journal article supplement (doi:10.1155/2020/2908108), 2020-04-15

Figure S1

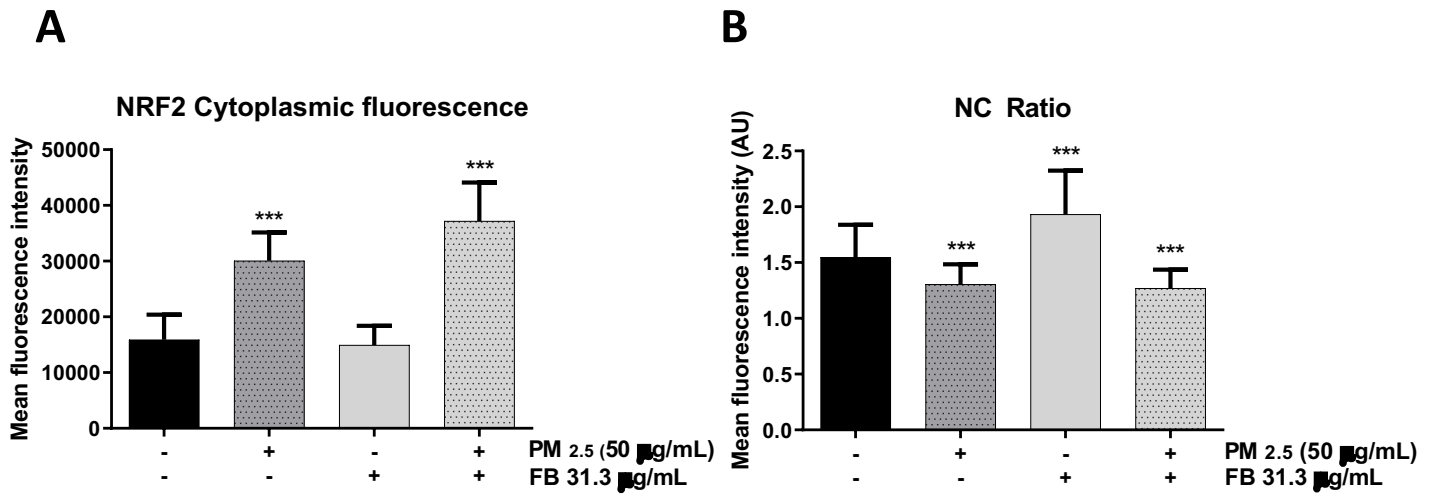

Supplement: f1 [file 2908108.f1.pdf]
